# Supplementary material for: A chirality rewriting cycle mediated by a dynamic cyclen–calcium complex
Source: Royal Society of Chemistry journal article supplement (doi:10.1039/c2cc35350d), 2012-01-01
Supplement: c2cc35350d.pdf [file c2cc35350d.pdf]

*Supporting Information for:*

## ***Chirality Rewriting Cycle Mediated by Dynamic Cyclen-Calcium Complex***

**Hiroshi Ito, Hiroshi Tsukube and Satoshi Shinoda\***

*JST, CREST, and Department of Chemistry, Graduate School of Science, Osaka City University  
3-3-138 Sugimoto, Sumiyoshi-ku, Osaka 558-8585, Japan*

### **Materials and Instruments**

**Materials.** Alkyne **3** and azide **4** were synthesized according to the reported method.<sup>1,2</sup> Starting materials and dehydrated solvents were purchased from Tokyo Chemical Industry (Tokyo, Japan), Wako Pure Chemical Industries (Osaka, Japan), Nakalai Tesque Inc. (Kyoto, Japan) and Sigma-Aldrich Co. (St. Louis, USA). Silica gel (SiO<sub>2</sub>) for column chromatography was purchased from Merck (Darmstadt, Germany). Aluminium oxide (Al<sub>2</sub>O<sub>3</sub>, basic) for column chromatography was purchased from Wako Pure Chemical Industries (Osaka, Japan).

**Instruments.** <sup>1</sup>H and <sup>13</sup>C{<sup>1</sup>H} NMR spectra were recorded on a JEOL lambda 300 spectrometer operating at 300 MHz for <sup>1</sup>H and 75 MHz for <sup>13</sup>C, or a JEOL lambda 400 spectrometer operating at 400 MHz for <sup>1</sup>H and 100 MHz for <sup>13</sup>C. Chemical shifts are reported in parts per million ( $\delta$ ) downfield from tetramethylsilane (TMS) for <sup>1</sup>H and a deuterated solvent for <sup>13</sup>C, respectively. IR spectra were recorded on a PerkinElmer Spectrum One FT-IR spectrometer. Absorption spectra were measured using a 0.5-cm or 0.2-cm quartz cell on a JASCO V-670 spectrophotometer. CD spectra were measured using a 0.5-cm or 0.2-cm quartz cell on a JASCO J-820 spectropolarimeter. X-Ray data were collected on a Rigaku/MSM Mercury CCD diffractometer with graphite monochromated Mo K $\alpha$  radiation. Elemental analyses were performed at the Microanalytical Laboratory, Graduate School of Science, Osaka City University.

## Synthetic Procedures and Product Characterizations

### Synthesis of **5**.

Copper (II) sulfate pentahydrate (55 mg, 0.22 mmol) was added to a mixture of **3** (1.41 g, 2.8 mmol), 3-azidocoumarin **4** (517 mg, 2.8 mmol) and sodium L-ascorbate (475mg, 2.8 mmol) in MeOH / THF (v/v = 5:1, 60 mL). The heterogeneous mixture was stirred overnight, and the solvent was evaporated. CH<sub>2</sub>Cl<sub>2</sub> (40 mL) was added to the residue. The organic layer was washed with water (30 mL x 3), and then dried over anhydrous sodium sulfate. After removal of the solvent under reduced pressure, the crude product was purified by column chromatography (SiO<sub>2</sub>, CH<sub>2</sub>Cl<sub>2</sub>/MeOH = 100:3 (v/v)) to afford **5** (1.77g, 92%) as a pale yellow solid: mp 120 °C; IR (KBr)  $\nu$  3448, 2975, 2931, 1745, 1731, 1685, 1610, 1466, 1415, 1365, 1250, 1170, 1039, 981, 947, 920, 861, 772, 759 cm<sup>-1</sup>; <sup>1</sup>H NMR (CDCl<sub>3</sub>, 300 MHz):  $\delta$  8.60 (s, 1H), 8.57 (s, 1H), 7.8–7.6 (m, 2H), 7.5–7.3 (m, 2H), 4.04 (s, 2H), 3.7–3.3 (m, 12H), 3.7–3.3 (m, 12H), 1.48 (s, 9H), 1.45 (s, 9H), 1.44 (s, 9H) ppm; <sup>13</sup>C NMR (CDCl<sub>3</sub>, 75 MHz):  $\delta$  156.30, 155.88, 155.55, 152.78, 142.48, 133.10, 132.90, 129.06, 125.73, 124.22, 123.20, 118.24, 116.89, 79.75, 79.61, 79.37, 54.61, 53.37, 50.15, 47.81, 47.40, 45.03, 28.88, 28.64 ppm; Anal. Calcd for C<sub>35</sub>H<sub>51</sub>N<sub>7</sub>O<sub>8</sub>·0.5 H<sub>2</sub>O: C, 59.47; H, 7.42; N, 13.87. Found C, 59.76; H, 7.34; N, 13.88.

### Synthesis of **6**·3HCl.

Hydrochloric acid (5 M, 20 mL) was added to **5** (1.80 g, 2.7 mmol), and the mixture was stirred at 90 °C for 1 h. The solvent was evaporated, and the residue was washed successively with THF, Et<sub>2</sub>O, and hexane, and then **6**·3HCl was obtained as a white solid (1.16 g, 81%): mp 260 °C (decomp.); IR (KBr)  $\nu$  3446, 1747, 1611, 1128, 1108, 1045, 759 cm<sup>-1</sup>; <sup>1</sup>H NMR (D<sub>2</sub>O, 300 MHz):  $\delta$  8.53 (s, 1H), 8.39 (s, 1H), 7.8–7.6 (m, 2H), 7.5–7.3 (m, 2H), 4.00 (s, 2H), 3.4–3.2 (m, 8H), 3.12 (br, 4H), 2.95 (br, 4H) ppm; <sup>13</sup>C NMR (D<sub>2</sub>O, 75 MHz):  $\delta$  158.25, 152.67, 142.25, 137.86, 134.08, 129.79, 126.26, 126.15, 122.45, 117.88, 116.71, 47.89, 46.41, 44.20, 42.53, 41.94 ppm; Anal. Calcd for C<sub>20</sub>H<sub>27</sub>N<sub>7</sub>O<sub>2</sub>·3HCl: C, 47.39; H, 5.97; N, 19.34. Found C, 47.20; H, 5.94; N, 19.10.

### Synthesis of **2**-Na<sup>+</sup>.

A mixture of **6**·3HCl (506 mg, 1.0 mmol), 2-(chloromethyl)pyridine hydrochloride (656 mg, 4.0 mmol), Na<sub>2</sub>CO<sub>3</sub> (2.12 g, 20 mmol), and NaI (375 mg, 2.5 mmol) in CH<sub>3</sub>CN (25 mL) was refluxed for 7 h, and the solvent was then evaporated. CH<sub>2</sub>Cl<sub>2</sub> was added to the residue, and the solid was filtered. The residue was purified by column chromatography (basic Al<sub>2</sub>O<sub>3</sub>, CH<sub>2</sub>Cl<sub>2</sub>/MeOH = 100:5 (v/v)) to afford **2**-Na<sup>+</sup>·1.5H<sub>2</sub>O (379 mg, 48%). Mp. 220 °C (decomp.); IR (KBr)  $\nu$  3434, 2822, 1731, 1609, 1594, 1472, 1436, 1095, 1044, 997, 760 cm<sup>-1</sup>; <sup>1</sup>H NMR (CD<sub>3</sub>CN, 300 MHz):  $\delta$  8.40 (s, 1H), 8.16 (br s, 2H), 8.12 (s, 1H), 7.8–7.5 (m, 6H), 7.5–7.3 (m, 2H), 7.3–6.9 (m, 6H), 3.6–3.2 (m, 8H), 3.2–2.2 (br, 16H) ppm; <sup>13</sup>C NMR (CD<sub>3</sub>CN, 75 MHz):  $\delta$  159.80, 159.76, 157.11, 153.73, 150.42, 149.88, 145.34, 137.86, 137.82, 135.24, 133.90, 130.19, 126.39, 125.33, 124.67, 124.60, 124.34, 123.17, 119.08, 117.34, 59.91, 59.66, 51.23, 51.15, 50.78, 49.28 ppm; Anal. Calcd for C<sub>38</sub>H<sub>42</sub>N<sub>10</sub>O<sub>2</sub>·NaI·1.5 H<sub>2</sub>O: C, 53.84; H, 5.35; N, 16.52. Found C, 53.85; H, 5.19; N, 16.38.

### Synthesis of **2**-Ca<sup>2+</sup>.

A mixture of **2**-Na<sup>+</sup> (121 mg, 0.15 mmol) and CaI<sub>2</sub> (50 mg, 0.17 mmol) in CH<sub>3</sub>CN was stirred at 50 °C for 2 h, and the resulting solution was evaporated. CH<sub>2</sub>Cl<sub>2</sub> was added to the residue, and the solid was filtered. Reprecipitation from CH<sub>2</sub>Cl<sub>2</sub>/hexane yielded **2**-Ca<sup>2+</sup> (76.5 mg, 54 %) as a pale yellow powder. Mp. 220–30 °C (decomp.); IR (KBr)  $\nu$  3445, 2851, 1732, 1603, 1478, 1458, 1438, 1308, 1085, 1064, 1004, 958, 764 cm<sup>-1</sup>; <sup>1</sup>H NMR (CD<sub>3</sub>CN, 300 MHz):  $\delta$  8.50 (s, 1H), 8.13 (s, 1H), 8.0–7.7 (m, 6H), 7.5–7.3 (m, 6H), 7.3–7.1 (m, 4H), 4.1–3.4 (m, 12H), 3.2–2.8 (m, 4H), 2.6–2.3 (m, 8H) ppm; <sup>13</sup>C NMR (CD<sub>3</sub>CN, 75 MHz):  $\delta$  159.13, 159.00, 158.84, 156.90, 154.04, 149.89, 149.12, 148.62, 145.70, 140.71, 140.65, 139.81, 137.06, 134.52, 130.50, 126.66, 126.53, 126.10, 126.04, 125.40, 125.34, 125.30, 124.46, 123.94, 118.71, 117.49, 59.56, 59.49, 59.44, 52.49, 52.43, 52.20, 52.04, 50.77, 50.69, 50.33, 49.46 ppm; Anal. Calcd for C<sub>38</sub>H<sub>42</sub>N<sub>10</sub>O<sub>2</sub>·CaI<sub>2</sub>·2.5H<sub>2</sub>O: C, 45.20; H, 4.69; N, 13.87. Found C, 45.05; H, 4.42; N, 13.48.

The **2**-Ca<sup>2+</sup> complex for crystal structure determination was obtained by further recrystallization from CH<sub>2</sub>Cl<sub>2</sub>/hexane.

### Chirality writing, deleting and rewriting cycle (Fig. 4)

Boc-L-Pro·DCHA (20 mM in CHCl<sub>3</sub>, 18 μL) was added to the solution of **2**-Ca<sup>2+</sup> (0.2 mM in CHCl<sub>3</sub>, 1.8 mL, 5 mm-quartz cell). Then, TMSCHN<sub>2</sub> (0.6 M in hexane, 1.2 μL) was added to the mixture, and the resultant mixture was stirred for 30 min. In the same manner, Boc-D-Pro·DCHA (20 mM in CHCl<sub>3</sub>, 36 μL), TMSCHN<sub>2</sub> (0.6 mM in hexane, 1.2 μL), Boc-L-Pro·DCHA (20 mM in CHCl<sub>3</sub>, 72 μL), TMSCHN<sub>2</sub> (0.6 mM in hexane, 3.6 μL), Boc-D-Pro·DCHA (20 mM in CHCl<sub>3</sub>, 180 μL) were successively added to the mixture. CD spectra were recorded on each step.

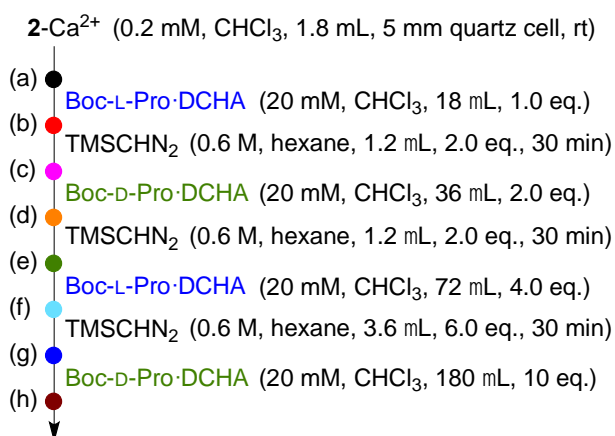

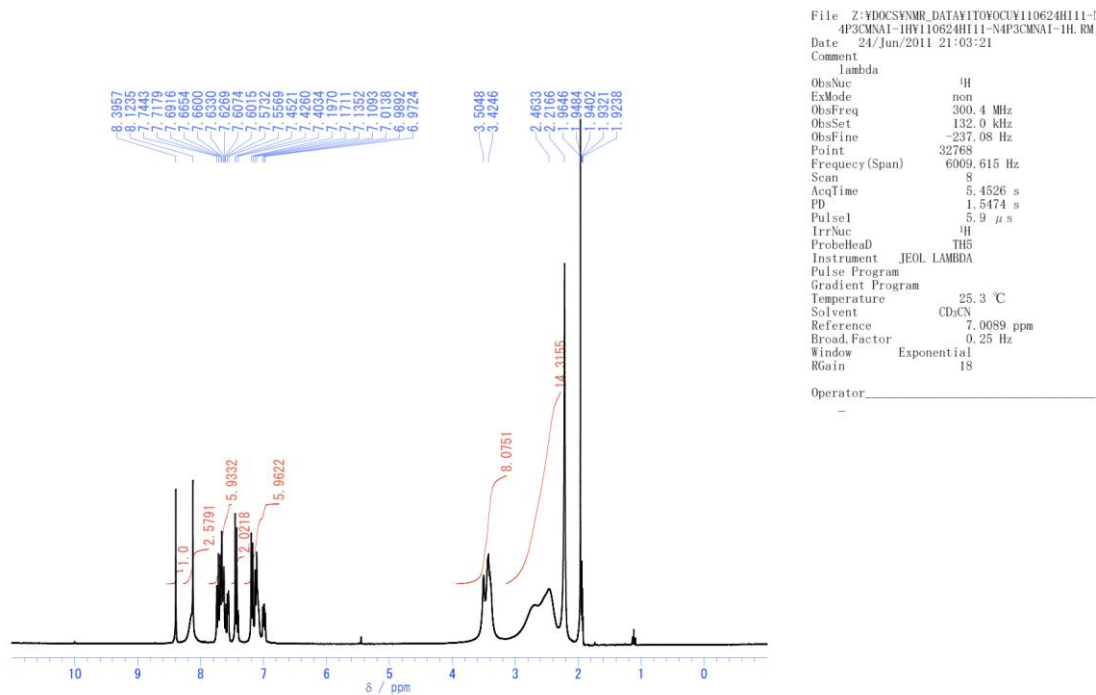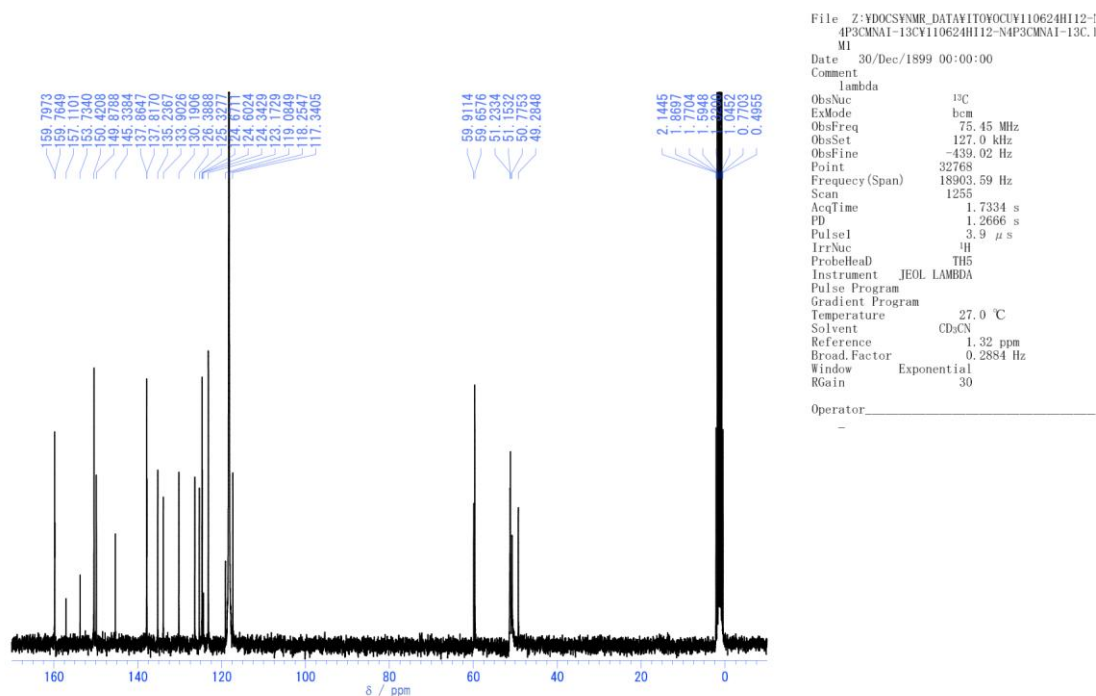

**Fig. S1** <sup>1</sup>H and <sup>13</sup>C NMR spectra of **2-Na<sup>+</sup>** in CD<sub>3</sub>CN.

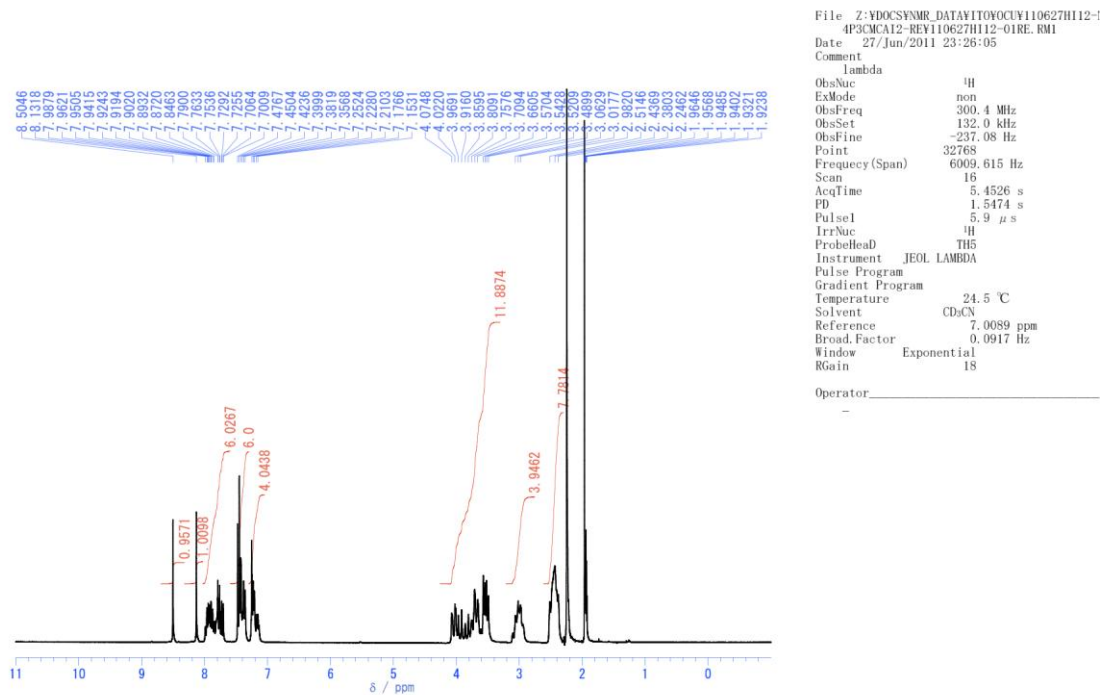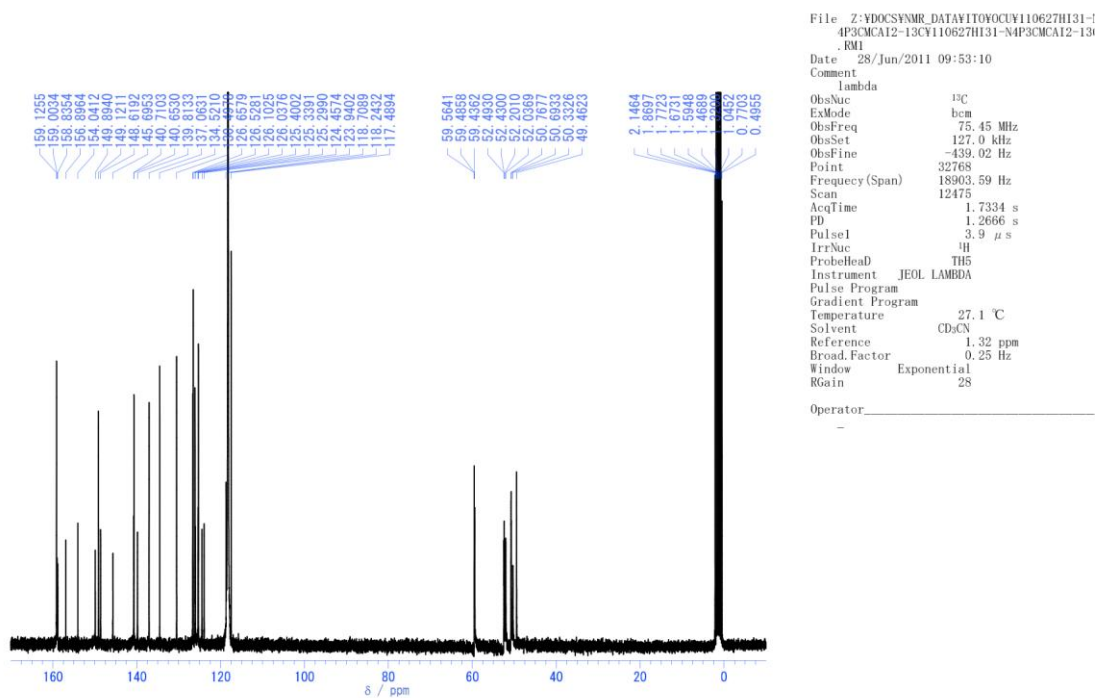

**Fig. S2** <sup>1</sup>H and <sup>13</sup>C NMR spectra of **2**-Ca<sup>2+</sup> in CD<sub>3</sub>CN.

**Table S1** Crystal and structure refinement data for **2**-Ca<sup>2+</sup> complex.

|                                         | <b>2</b> -Ca <sup>2+</sup>                                                                                                                            |
|-----------------------------------------|-------------------------------------------------------------------------------------------------------------------------------------------------------|
| Empirical formula                       | (C <sub>38</sub> H <sub>42</sub> I <sub>2</sub> N <sub>10</sub> CaO <sub>2</sub> )·(CH <sub>2</sub> Cl <sub>2</sub> ) <sub>2</sub> ·2H <sub>2</sub> O |
| Formula weight                          | 1170.58                                                                                                                                               |
| Crystal system, space group             | Monoclinic                                                                                                                                            |
| a / Å                                   | 11.6703(10)                                                                                                                                           |
| b / Å                                   | 21.1654(18)                                                                                                                                           |
| c / Å                                   | 39.374(4)                                                                                                                                             |
| α / deg.                                | 90                                                                                                                                                    |
| β / deg.                                | 94.024(2)                                                                                                                                             |
| γ / deg.                                | 90                                                                                                                                                    |
| Volume / Å <sup>3</sup>                 | 9701.7(15)                                                                                                                                            |
| Z                                       | 8                                                                                                                                                     |
| Calculated density / Mg m <sup>-3</sup> | 1.603                                                                                                                                                 |
| μ / mm <sup>-1</sup>                    | 1.672                                                                                                                                                 |
| refins collected / unique               | 36848 / 10392                                                                                                                                         |
| data / restraints / params              | 14474 / 0 / 1135                                                                                                                                      |
| final R indices                         | R1 = 0.0521                                                                                                                                           |
| [I > 2σ(I)]                             | wR2 = 0.1196                                                                                                                                          |
| R indices (all data)                    | R1 = 0.0755                                                                                                                                           |
|                                         | wR2 = 0.1303                                                                                                                                          |
| GOF                                     | 1.022                                                                                                                                                 |

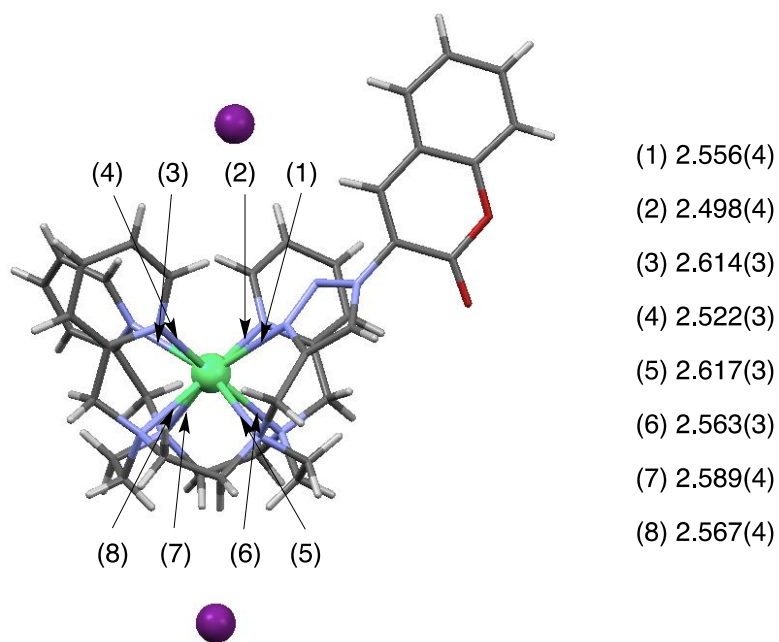

**Fig. S3** Crystal structure and coordination bond lengths of **2-Ca<sup>2+</sup>**.

#### References

- [1] K. Jobe, C. H. Brennan, M. Motevalli, S. M. Goldup, M. Watkinson, *Chem. Commun.* **2011**, 47, 6036–6038.
- [2] F. Shi, J. P. Waldo, Y. Chen, R. C. Larock, *Org. Lett.* **2008**, 10, 2409–2412.
- [3] F. Favarger, C. Goujon-Ginglinger, D. Monchaud, J. Lacour, *J. Org. Chem.* **2004**, 69, 8521–8524.
